## RESEARCH REPORT

## TECHNIQUES AND RESOURCES

# Dynamic visualization of transcription and RNA subcellular localization in zebrafish

Philip D. Campbell<sup>1</sup>, Jeffrey A. Chao<sup>2,3</sup>, Robert H. Singer<sup>2,4,5</sup> and Florence L. Marlow<sup>1,4,\*</sup>

## ABSTRACT

Live imaging of transcription and RNA dynamics has been successful in cultured cells and tissues of vertebrates but is challenging to accomplish *in vivo*. The zebrafish offers important advantages to study these processes – optical transparency during embryogenesis, genetic tractability and rapid development. Therefore, to study transcription and RNA dynamics in an intact vertebrate organism, we have adapted the MS2 RNA-labeling system to zebrafish. By using this binary system to coexpress a fluorescent MS2 bacteriophage coat protein (MCP) and an RNA of interest tagged with multiple copies of the RNA hairpin MS2-binding site (MBS), live-cell imaging of RNA dynamics at single RNA molecule resolution has been achieved in other organisms. Here, using a Gateway-compatible MS2 labeling system, we generated stable transgenic zebrafish lines expressing MCP, validated the MBS-MCP interaction and applied the system to investigate zygotic genome activation (ZGA) and RNA localization in primordial germ cells (PGCs) in zebrafish. Although cleavage stage cells are initially transcriptionally silent, we detect transcription of MS2-tagged transcripts driven by the *βactin* promoter at ~3-3.5 h post-fertilization, consistent with the previously reported ZGA. Furthermore, we show that MS2-tagged *nanos3* 3'UTR transcripts localize to PGCs, where they are diffusely cytoplasmic and within larger cytoplasmic accumulations reminiscent of those displayed by endogenous *nanos3*. These tools provide a new avenue for live-cell imaging of RNA molecules in an intact vertebrate. Together with new techniques for targeted genome editing, this system will be a valuable tool to tag and study the dynamics of endogenous RNAs during zebrafish developmental processes.

**KEY WORDS:** *In vivo* RNA labeling, Transcription, MS2, Transgenic zebrafish

## INTRODUCTION

Given the vital roles coding and noncoding RNAs play in cell biology, it is not surprising that regulatory mechanisms coordinate every step of RNA metabolism, from transcription to translational capacity and, ultimately, degradation (Garneau et al., 2007; Holt and Bullock, 2009). To fully understand RNA regulation as it occurs *in vivo* requires detection and visualization of RNA in the living organism. Many tools have been used to study RNA dynamics in

cell culture (Armitage, 2011; Santangelo et al., 2012); however, they have yet to be widely extended to studies in living vertebrates. One tool, the MS2 RNA-labeling system, based on the high-affinity binding of the bacteriophage MS2 coat protein (MCP) to its RNA hairpin binding site (MBS), has been used in model organisms (Bertrand et al., 1998; Belaya and St Johnston, 2011; Lionnet et al., 2011). By labeling a gene of interest with multiple copies of MBS and coexpressing a fluorescent MCP, live-cell imaging of RNA dynamics with single RNA molecule resolution is possible (Hocine et al., 2013). Tagging the fluorescent MCP with a nuclear localization signal (NLS) primes the MCP for interactions with nascent RNAs in the nucleus and reduces cytoplasmic background fluorescence, allowing enhanced visualization of cytoplasmic transcripts. This method has been used to study *Drosophila* oogenesis (Belaya and St Johnston, 2011) and embryogenesis (van Gemert et al., 2009), trafficking in *Xenopus* oocytes (Gagnon et al., 2013) and recently in brain slices of mice (Park et al., 2014) but has not been applied to vertebrate development. We have developed and applied a Gateway-based MS2-MCP system (Hartley et al., 2000; Walhout et al., 2000; Kwan et al., 2007; Villefranc et al., 2007) for the easy generation of expression vectors and stable transgenic zebrafish lines expressing fluorescent MCPs (FP-MCP). We have validated its use in zebrafish and have used it to study the onset of zygotic *βactin* transcription and *nanos3* localization in PGCs. Together with established methods of transgenesis and mutagenesis, these tools should facilitate future studies of RNA regulation in living vertebrates.

## RESULTS AND DISCUSSION

### Transgenic NLS-tdMCP-GFP lines

We developed a set of Gateway-compatible plasmids to facilitate generation of MCP expression vectors (Fig. 1A). Using these plasmids and Tol2-mediated transgenesis (Kawakami et al., 1998, 2004; Kawakami, 2007), we generated stable transgenic zebrafish lines expressing MCP as a tandem dimer (tdMCP) (Wu et al., 2012) fused to a NLS and eGFP under the control of the ubiquitous *βactin* (Higashijima et al., 1997) and inducible *hsp70* (Halloran et al., 2000) promoters (supplementary material Fig. S1). In all lines, the labeled cells displayed the expected nuclear fluorescence with minimal cytoplasmic background (supplementary material Fig. S1).

### Validation of MCP-MBS interaction in zebrafish

To validate and test the feasibility of this system to visualize RNA molecules in zebrafish, we transiently and mosaically expressed *cherry* RNA tagged with MS2 hairpins using the *βactin* promoter (*βactin:cherry-24xMBS*) by injecting DNA into *Tg(βactin:NLS-tdMCP-GFP)* lines (Fig. 1B). Live imaging of zebrafish embryos revealed tdMCP-GFP cytoplasmic puncta in cells expressing the Cherry protein (Fig. 1C-E), likely representing *cherry-24xMBS* RNA species, as previously reported in other systems (Bertrand et al., 1998; van Gemert et al., 2009; Lionnet et al., 2011;

<sup>1</sup>Department of Developmental and Molecular Biology, Albert Einstein College of Medicine, Yeshiva University, 1300 Morris Park Av, Bronx, NY 10461, USA.

<sup>2</sup>Department of Anatomy and Structural Biology, Albert Einstein College of Medicine, Yeshiva University, 1300 Morris Park Av, Bronx, NY 10461, USA.

<sup>3</sup>Friedrich Meischer Institute for Biomedical Research, Maulbeerstrasse 66, Basel 4058, Switzerland. <sup>4</sup>Department of Neuroscience, Albert Einstein College of Medicine, Yeshiva University, 1300 Morris Park Av, Bronx, NY 10461, USA.

<sup>5</sup>Department of Cell Biology, Albert Einstein College of Medicine, Yeshiva University, 1300 Morris Park Av, Bronx, NY 10461, USA.

\*Author for correspondence (florence.marlow@einstein.yu.edu)

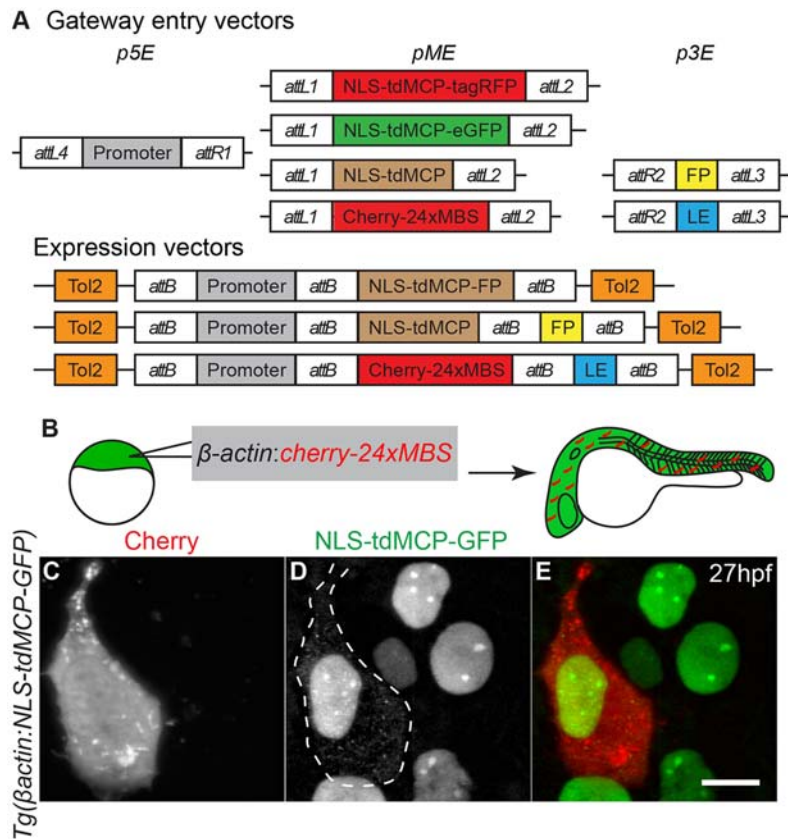

**Fig. 1. Transgenic zebrafish lines expressing NLS-tdMCP-eGFP can be used to detect transcripts *in vivo*.** (A) Gateway compatible vectors for generation of NLS-tdMCP-FP and MS2-tagged RNAs. Plasmids used to generate transgenic lines by Tol2-mediated transgenesis are shown. 5' Entry plasmids (*p5E*) containing the desired promoter elements can be recombined with NLS-tdMCP-eGFP or NLS-tdMCP-tagRFP entry plasmids (*pME*) for expression in any cell type or tissue. Similarly, the *pME*-NLS-tdMCP plasmid can be recombined with any in-frame fluorescent protein (FP) in a 3' entry plasmid (*p3E*) to make custom NLS-tdMCP-FPs. RNA localization elements (LE) can be tagged with *cherry-24xMBS* by recombining the appropriate *pME* and *p3E* plasmids. (B) Schematic of the experiment used to validate *in vivo* MS2-MCP interactions. (C-E) Live imaging of embryos at the sphere stage shows that cytoplasmic puncta are visible only in cells expressing the Cherry reporter. In some cases, as shown in C, the Cherry reporter aggregates, but does not overlap with MCP-GFP cytoplasmic puncta, suggesting that this is independent of the MS2-MCP interaction. The dotted line denotes borders of cells expressing Cherry reporter. Scale bar: 10  $\mu$ m.

Schonberger et al., 2012; Gagnon et al., 2013; Park et al., 2014). Furthermore, time-lapse analysis of these cells revealed highly dynamic cytoplasmic puncta (supplementary material Movies 1 and 2) that were not detected in neighboring cells lacking the Cherry reporter ( $n=43$  cells; 6 embryos). These experiments suggested that MS2-RNA labeling is feasible in zebrafish.

### Visualization of zygotic genome activation

An advantage of MS2 labeling is the ability to track transcripts throughout their lifetime, because nuclear puncta appear soon after transcriptional activation (Larson et al., 2011; Lionnet et al., 2011; Park et al., 2014). We utilized this property to investigate the time course of zygotic genome activation (ZGA) in zebrafish. The zebrafish genome is quiescent until  $\sim 3$  h post-fertilization (hpf) (Giraldez et al., 2006; Schier, 2007; Dalle Nogare et al., 2009; Tadros and Lipshitz, 2009; Harvey et al., 2013), around the time of the mid-blastula transition (MBT). Development before this period is controlled by maternal factors, many of which are replaced by zygotic products after ZGA (Giraldez et al., 2006; Schier, 2007; Langley et al., 2014; Lee et al., 2014) (Fig. 2A). Genome-wide sequencing studies have identified the time-frame of ZGA (Harvey et al., 2013; Langley et al., 2014); however, it has not been possible to visualize ZGA over time on a single-cell basis, something which MS2 labeling might permit. Previous studies have shown that, like the zygotic genome, transcription from injected plasmid DNA is repressed until ZGA (Newport and Kirschner, 1982). To investigate the onset of transcription driven by the *beta-actin* promoter, we co-injected *Tg(beta-actin:NLS-tdMCP-GFP)* embryos with a Tol2-flanked DNA encoding *cherry-24xMBS* expressed from the *beta-actin* promoter, and RNA encoding the Tol2 Transposase to facilitate genomic integration. Embryos were examined at stages before and after ZGA for nuclear puncta (Fig. 2B). No nuclear puncta were

detected in uninjected embryos at any time point assayed (supplementary material Fig. S2;  $n=9$  embryos each at 3, 3.5, 4 and 4.5 hpf) nor in embryos injected with the *beta-actin:cherry* control plasmid DNA lacking MBS (Fig. 2C,D;  $n=13, 13, 11$  and 14 at 3, 3.5, 4 and 4.5 hpf, respectively). By contrast, at 3.5 hpf and stages thereafter nuclear puncta were present in subsets of cells in most embryos injected with *beta-actin:cherry-24xMBS* (embryos with nuclear puncta at 3.5 hpf,  $n=11/11$ ; at 4 hpf,  $n=9/10$ ; at 4.5 hpf,  $n=16/17$ ) but not at earlier stages (Fig. 2E,F; 3 hpf embryos with nuclear puncta  $n=1/17$ ). Furthermore, *cherry-24xMBS* expressed from a promoter element that is not activated at ZGA yielded no nuclear puncta at 4.5 hpf (supplementary material Fig. S3), further suggesting that the puncta represent transcriptional events. Where nuclear puncta were detected, the number ranged from one to more than ten per nucleus. Because DNA was injected, the number of puncta could reflect the plasmid copy number and the transcriptional activity of the cell. Consistent with this notion, injection of 100 pg of *beta-actin:cherry-24xMBS* DNA yielded more nuclear puncta at 4.5 hpf ( $n=36$  nuclei, 7 embryos; 9.28 puncta per nucleus) than injection of 25 pg ( $n=58$  nuclei, 8 embryos; 3.12 puncta per nucleus;  $P=8.14 \times 10^{-7}$ ). Our results are consistent with previous work suggesting that ZGA occurs at  $\sim 3$  hpf (Giraldez et al., 2006; Schier, 2007; Dalle Nogare et al., 2009; Tadros and Lipshitz, 2009). In addition, time-lapse analysis revealed that these transcriptional events are dynamic, because both appearing and disappearing puncta were detected (supplementary material Movie 3). We also captured fluorescence signals exiting the nucleus in cells with nuclear puncta, suggesting that the MBS-MCP complex can be exported from the nucleus (supplementary material Movie 4).

Conventional *in vivo* promoter reporters generally use a fluorescent protein to readout transcriptional activity. Using the

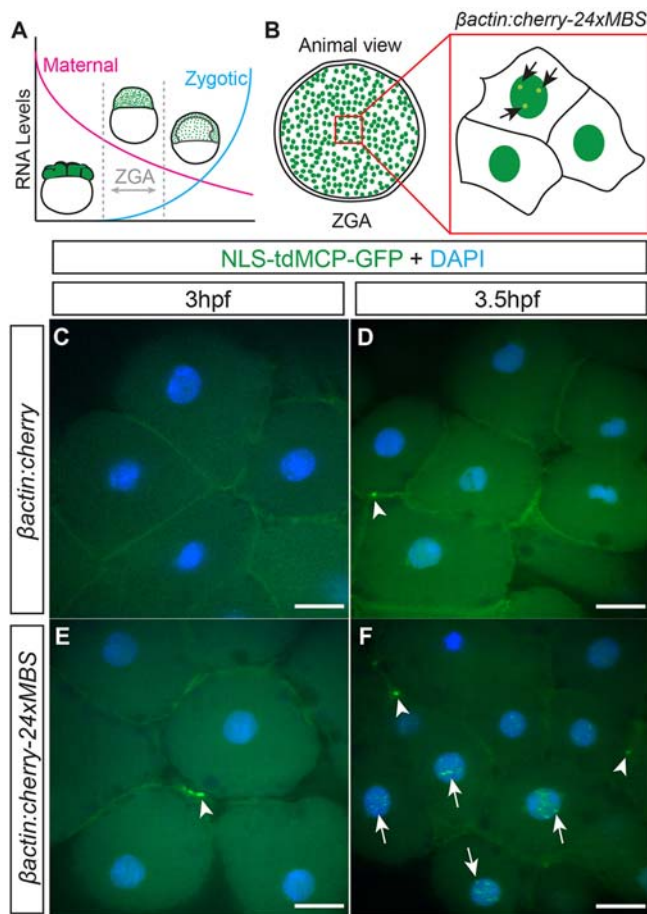

**Fig. 2. MS2-labeling reveals the onset of transcription in zebrafish embryos.** (A) Immediately after fertilization, the RNA present is exclusively comprised of maternal products. After ZGA, zygotic transcripts begin to accumulate and replace maternal transcripts. (B) Embryos were injected with DNA encoding MS2-tagged-cherry RNA expressed from the *betaactin* promoter and assayed for nuclear puncta around the time of ZGA (3-4.5 hpf). (C-F) Animal pole view of fixed embryos showing that *betaactin:cherry*-injected control embryos at (C) 3 hpf and (D) 3.5 hpf have no nuclear puncta. Animal pole views of fixed embryos injected with *betaactin:cherry-24xMBS* at (E) 3 hpf and (F) 3.5 hpf showing that nuclear puncta (arrows) are not detected at 3 hpf but are apparent at 3.5 hpf and beyond. Both injected (C-F) and uninjected (supplementary material Fig. S2) embryos display accumulations of MCP-GFP at cell membranes (arrowheads). Scale bars: 25  $\mu$ m.

MCP transgenic lines, the protein that detects transcripts (MCP) is maternally provided and present within the nucleus, and is thus poised to detect nascent transcripts. This design effectively eliminates lag between transcription, translation and protein detection, as well as concerns that fluorescent protein stability might extend beyond the transcriptionally active period, common problems with conventional fluorescent protein transcriptional reporters. As evidence of this, Cherry reporter protein expression was not detectable at the blastula stages assayed when nuclear MBS-MCP-GFP puncta were first apparent, underscoring the usefulness of the system. Transcriptional nuclear puncta were detected in all cell types assayed (supplementary material Fig. S4). Of note, in *Tg(betaactin:NLS-tdMCP-GFP)* transgenic embryos at gastrula stages and beyond, large globular nuclear accumulations became prominent, predominantly in skin cells (supplementary material Fig. S3A,B) and enveloping layer cells (Fig. 3B). These structures were qualitatively different and easily distinguishable

from the transcriptional puncta observed in cells expressing MBS-tagged RNAs (supplementary material Fig. S3A,B). Combined with advances in targeted mutagenesis and targeted insertions into the zebrafish genome (Chang et al., 2013; Hruscha et al., 2013; Hwang et al., 2013a,b; Auer et al., 2014; Shin et al., 2014), it should be possible to insert MBS tags into endogenous loci to probe endogenous transcription in the future.

### Visualization of germ granule-like *nanos3* RNA accumulations

To determine whether the MS2 system could recapitulate the localization of an endogenous zebrafish RNA, we fused MS2 tags to the *nanos3* 3'UTR (Kopranner et al., 2001). *nanos3* is required to maintain PGCs and localizes to them beginning after ZGA (Kopranner et al., 2001; Draper et al., 2007). This localization is achieved through 3'UTR-mediated stabilization of *nanos3* transcripts in PGCs and microRNA (miRNA)-mediated degradation in somatic cells (Kopranner et al., 2001; Giraldez et al., 2006; Mishima et al., 2006). We injected *cherry-24xMBS-nanos3* 3'UTR RNA (hereafter called *cherryMBSnos3'utr*) into *Tg(betaactin:NLS-tdMCP-GFP)* embryos and analyzed fixed embryos at time points before and after clearance of *nanos3* RNA from somatic cells (Fig. 3A). Before complete clearance of the RNA, MCP-GFP was cytoplasmic in cells expressing the Cherry label (Fig. 3D,G), although no cytoplasmic signals were detected in uninjected embryos (Fig. 3B,E). Of note, MCP-GFP foci were also detected at the membrane between adjacent cells (Fig. 3D,G). Similar accumulations were detected in embryos injected with *cherry-24xMBS* RNA lacking a UTR (Fig. 3C,F), and in uninjected *Tg(betaactin:NLS-tdMCP-GFP)* embryos, although they were less prominent (supplementary material Fig. S2). Thus, these accumulations represent a background artifact of expressing the NLS-tdMCP-GFP that becomes more prominent upon MBS-tagged RNA expression.

Similar to other fluorescent proteins tagged with the *nanos3* 3'UTR, *cherryMBSnos3'utr*, as indicated by Cherry expression by PGCs alone, was later specifically stabilized in the PGCs (Fig. 3I), reminiscent of endogenous *nanos3*, indicating that the MBS hairpins did not disrupt 3'UTR-mediated clearance and stabilization of the RNA (Mishima et al., 2006). In Cherry-positive PGCs, diffuse punctate cytoplasmic MCP-GFP revealed persisting RNA ( $n=99/122$  Cherry-positive PGCs, 21 embryos), which was not visible in somatic cells (Fig. 3H-K). Diffuse cytoplasmic MCP-GFP was never observed in PGCs of uninjected embryos ( $n=0/101$  PGCs, 15 embryos), although one or two small MCP-GFP accumulations were infrequently visible in perinuclear regions ( $n=19/101$  PGCs, 15 embryos), which probably represent nuclear breakdown associated with mitosis, based on nuclear morphology. Similar punctate signals have been observed for nuclear membrane proteins in dividing PGCs in other studies (Strasser et al., 2008).

To test whether *cherryMBSnos3'utr* localization revealed by the cytoplasmic MCP-GFP resembled that of endogenous *nanos3*, we used RNAscope technology (Gross-Thebing et al., 2014) to probe for *nanos3* RNA. Similar to MS2-tagged RNA, *nanos3* was diffusely cytoplasmic in PGCs but not in somatic cells (Fig. 4A,B). We also occasionally observed larger perinuclear accumulations of *nanos3* (Fig. 4B). Closer examination of Cherry-positive PGCs from *cherryMBSnos3'utr*-injected embryos revealed that, in addition to diffuse cytoplasmic MCP-GFP, a fraction of Cherry-positive PGCs displayed perinuclear accumulations of MCP-GFP (Fig. 4C-F). To test whether these accumulations colocalized with endogenous *nanos3*, we again utilized RNAscope technology

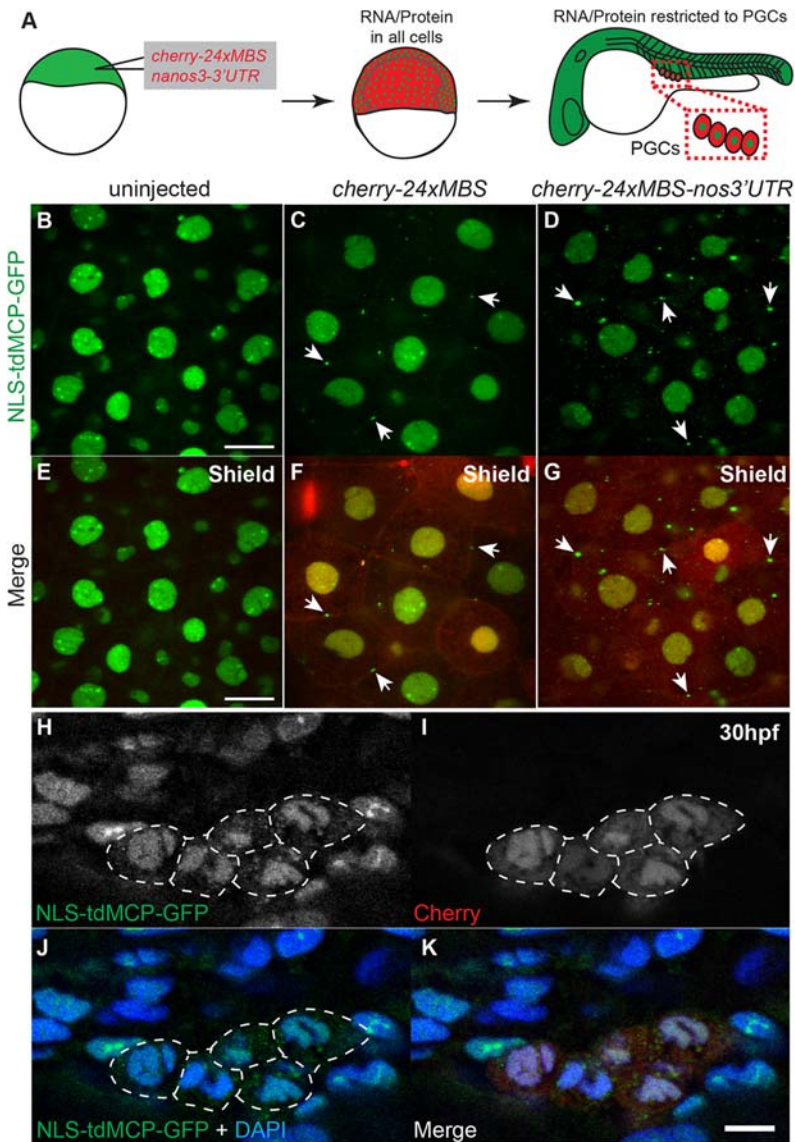

**Fig. 3. MS2-tagged *nanos3* 3' UTR is detected by MCP-GFP in the cytoplasm of PGCs.** (A) Schematic depicting injection and imaging of *cherry-24xMBS-nanos3 3' UTR* RNA. *cherry-24xMBS-nanos3 3' UTR* is initially in all cells but later is maintained only in PGCs. (B-G) Imaging of fixed embryos at the shield stage (B,E) and cytoplasmic RNA visualized by MCP-GFP puncta in *cherry-24xMBS*- and *cherry-24xMBS-nos3' UTR*-injected embryos (C,D,F,G). Punctate accumulations of MCP-GFP are present on cell membranes of (F) *cherry-24xMBS*- and (G) *cherry-24xMBS-nos3' UTR*-injected embryos (arrows) indicating this represents a background artifact. Scale bars: 20 μm. (H-K) The Cherry reporter reveals PGCs at 30 hpf in embryos that were injected with *cherry-24xMBS-nos3' UTR*. PGCs expressing Cherry display cytoplasmic MCP-GFP, whereas somatic cells and non-expressing PGCs have strictly nuclear MCP-GFP. The dotted lines denote borders of cells expressing Cherry reporter. Scale bar: 10 μm.

(Gross-Thebing et al., 2014) to examine *nanos3* RNA. Importantly, to avoid detecting the injected *cherryMBSnos3'utr*, this probe specifically recognizes the open-reading frame of *nanos3* and not the 3' UTR (Gross-Thebing et al., 2014). In injected embryos, endogenous *nanos3* was again cytoplasmic in PGCs with occasional perinuclear accumulations (Fig. 4I). Based on MCP-GFP colocalization with endogenous *nanos3* (Fig. 4G-J), we conclude that *cherryMBSnos3'utr* recapitulates endogenous *nanos3* localization in PGCs and that the MCP-GFP fluorescence signal can serve to read out this RNA.

The *nanos3* accumulations resembled the localization patterns of other germ cell markers that promote germ cell survival or differentiation and localize to perinuclear germ granules, such as Vasa (Knaut et al., 2000; Hartung et al., 2014) and Dead end (Weidinger et al., 2003; Slanchev et al., 2009). To test whether MCP-GFP colocalized with germ granules, *cherryMBSnos3'utr*-injected transgenic animals were immunostained for Vasa protein. In Cherry-positive PGCs some cytoplasmic accumulations of MCP-GFP coincided with Vasa-granules and others did not (Fig. 4K-N), which might have functional significance given the role of *nanos3* in PGC maintenance (Draper et al., 2007). Moreover, this result

suggests that distinct populations of germ granules exist and is consistent with previous findings that germ plasm RNAs differentially accumulate during blastula cleavage stages (Theusch et al., 2006).

Our studies illustrate the feasibility of using MS2 RNA labeling to study transcription and RNA localization *in vivo* in zebrafish. Given that a growing number of biologically important processes, including the regulation of developmental transitions such as ZGA and MBT, involve regulation by non-coding RNA species such as miRNAs and long non-coding RNAs (lncRNAs) (Giraldez et al., 2006; Pauli et al., 2011, 2012), this system provides the potential to detect such molecules *in vivo*. Furthermore, with a growing number of targeted genetic manipulation techniques and an increasing wealth of transgenic disease models, these tools should permit future studies of RNA dynamics in development and disease.

## MATERIALS AND METHODS

### Animals

AB strain wild-type zebrafish embryos were obtained from natural matings and reared according to standard procedures (Westerfield, 2000). Embryos and larvae were raised in 1× Embryo Medium at 28.5°C and were staged

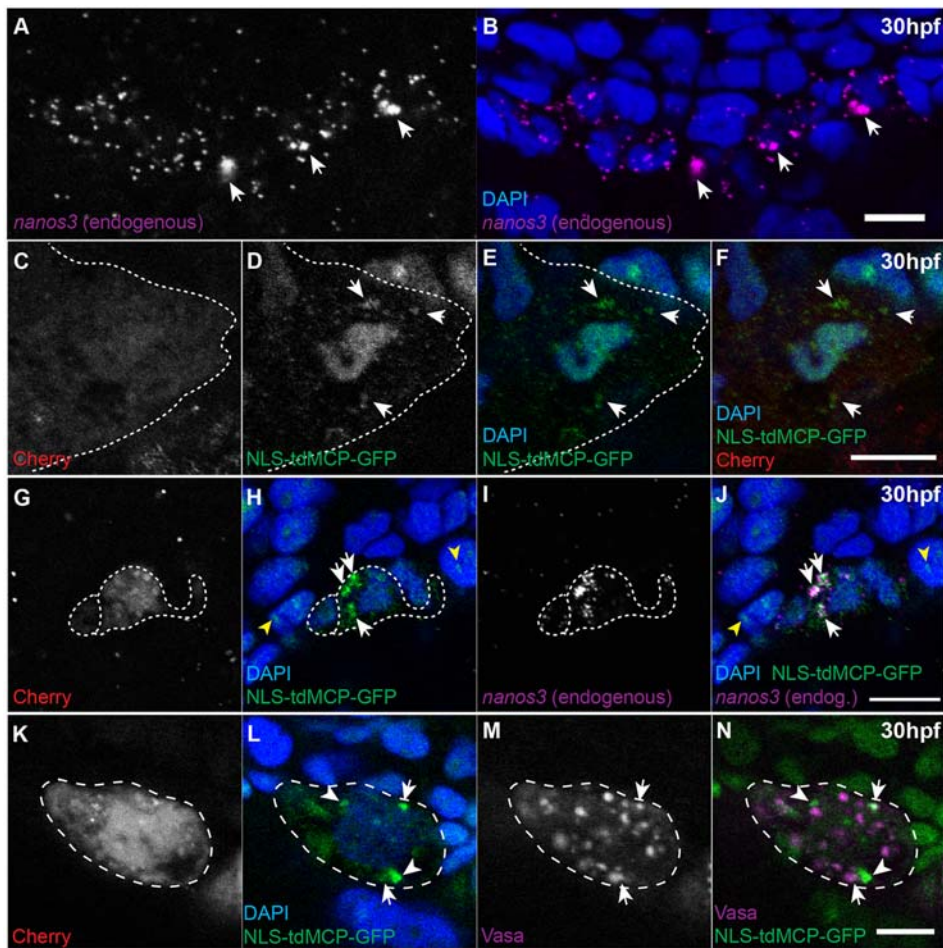

**Fig. 4. MS2-tagged *nos3' utr* colocalizes with endogenous *nos3* and a subset of Vasa-positive germ granules in PGCs.** (A,B) Endogenous *nos3* RNA localizes to PGCs at 30 hpf and is present throughout the cytoplasm and in larger perinuclear accumulations (arrows). Scale bar: 10  $\mu$ m. (C-F) Cherry-positive cells at 30 hpf have diffuse cytoplasmic MCP-GFP signal and larger perinuclear accumulations (arrows). Scale bar: 10  $\mu$ m. (G-J) Accumulations of MCP-GFP in Cherry-expressing PGCs at 30 hpf in *cherry-24xMBS-nos3' UTR*-injected embryos (white arrows) colocalize with endogenous *nos3* accumulations. Nonspecific nuclear aggregates of MCP-GFP (yellow arrowheads) do not colocalize with endogenous *nos3*, consistent with these structures being artifacts. Scale bar: 25  $\mu$ m. (K-N) A subset of MCP-GFP accumulations in Cherry-expressing PGCs at 30 hpf in *cherry-24xMBS-nos3' UTR*-injected embryos coincide with Vasa protein-positive germ granules (arrows) whereas others do not (arrowheads). Scale bar: 10  $\mu$ m. The dotted lines denote borders of cells expressing Cherry reporter.

as described previously (Kimmel et al., 1995). All procedures and experimental protocols were in accordance with NIH guidelines and approved by the Einstein Institutional Animal Care and Use Committee (protocol number 20140502).

### Plasmids

All primers are listed in supplementary material Table S1.

### MCP expression plasmids

NLS-HA-tdMCP-GFP and NLS-HA-tdMCP-tagRFP were amplified by PCR from *phage-UBC-NLS-HA-tdMCP-GFP* (Addgene, 40649) (Wu et al., 2012) and *phage-UBC-NLS-HA-tdMCP-tagRFP* (Wu et al., 2012) using *NLS-HA-tdMCP-FP-F+R* primers. NLS-tdMCP was amplified by PCR from *phage-UBC-NLS-HA-tdMCP-GFP* using *NLS-tdMCPF+R* primers. To add flanking *attL1* and *attL2* sites (Hartley et al., 2000; Walhout et al., 2000), PCR fragments were TOPO cloned into pCR8/GW/TOPO (K250020, Invitrogen) to make *pME-NLS-tdMCP-eGFP*, *pME-NLS-tdMCP-tagRFP* and *pME-NLS-tdMCP*. The *beta*actin (Higashijima et al., 1997) and *hsp70l* (Halloran et al., 2000) promoter 5' entry clones (p5E) were previously described (Kwan et al., 2007). Appropriate p5E and pME plasmids were recombined with *pTolDestR4-R2pA* (Villefranc et al., 2007) following the manufacturer's instructions (Invitrogen) to make *pTol-promoter:NLS-tdMCP-eGFP*.

### MBS-RNA expression plasmids

*pME-24xMBS* was created from *pCR4-24xMS2-SL* (Addgene, 31865), which was digested with *EcoRI*, to release 24xMBS, which was then ligated into pCR8/GW/TOPO. *pME-mCherry-24xMBS* was created by amplifying mCherry with flanking *BamHI* sites by PCR from *p3E-mCherry* (Kwan et al., 2007) using *p3E-mCherry-BamHI-F+R* primers, then ligating into

*pME-24xMBS*. *pCS-mCherry-24xMBS* was created by recombining *pME-mCherry-24xMBS* with *pCSDest* (Addgene, 22423) (Villefranc et al., 2007). *p3E-nanos3 3'UTR* was created by amplifying the *nanos3 3'UTR* with flanking *attB2R* and *attB3* sites by PCR from *pSP64GFP3'UTRnos* (Koprunner et al., 2001) using *pSP64GFP3'UTRnos-attB2R+3* primers and then recombining with pDONR P2R-P3 (Invitrogen). *pCS-mCherry-24xMBS-nanos3 3'UTR* was created by recombining *pME-mCherry-24xMBS* and *p3E-nanos3 3'UTR* with *pCSDest2* (Addgene: 22424) (Villefranc et al., 2007). To create *pTol-beta*actin:*mCherry-24xMBS*, *p5E-beta*actin and *pME-mCherry-24xMBS*, were recombined with *pTolDestR4-R2pA* (Villefranc et al., 2007), and to create *pTol-beta*actin:*mCherry*, *p5E-beta*actin, and *pME-mCherry*, were recombined with *pTolDestR4-R2pA*.

### MCP stable transgenic lines

Tol2 Transposase RNA, transcribed from *pCS2FA-transposase* (Kwan et al., 2007), and *pTol-Promoter:NLS-tdMCP-eGFP* circular DNA were combined (25 ng/ $\mu$ l each). Embryos were injected with 1 nl of this solution at the one-cell stage. GFP-expressing embryos were selected at 5 dpf and raised to generate founders (supplementary material Methods).

### Transient assays

25 ng/ $\mu$ l each of circular *pTol-beta*actin:*mCherry-24xMBS* DNA and Tol2 Transposase RNA were combined and injected as described above. For live imaging, embryos were scored for mCherry expression and imaged. For the time-course analysis, embryos were fixed in 4% paraformaldehyde every half hour from 3 hpf to 4.5 hpf.

*mCherry-24xMBS* and *mCherry-24xMBS-nanos3 3'UTR* RNAs were transcribed from *pCS-mCherry-24xMBS* and *pCS-mCherry-24xMBS-nanos3 3'UTR*, respectively. Plasmids were linearized with *NotI* and transcribed with the mMESSAGE mMACHINE T7 transcription kit

(AM1344, Life Technologies). 500 pg of RNA solution was injected as described above. Embryos were fixed with 4% paraformaldehyde at the shield stage and at 30 hpf and imaged.

### RNAscope *in situ* hybridization

Zebrafish whole-mount staining using the RNAscope Multiplex Fluorescent Reagent Kit (ACD Bio) was performed as described previously (Gross-Thebing et al., 2014). Briefly, 30 hpf embryos were fixed for 30 min in 4% paraformaldehyde, washed with PBT (PBS with 0.1% Tween), and dehydrated in MeOH at  $-20^{\circ}\text{C}$  overnight. Embryos were dried for 30 min at room temperature before pretreatment 3. RNAscope *Blank Probe C1* and *Dr-nanos3-CDS Probe C3* (ACD Bio 431191-C3) were hybridized overnight at  $40^{\circ}\text{C}$  at a 50:1 ratio. Embryos were postfixed with 4% paraformaldehyde and washed with  $0.2\times$  SSCT before the amplification steps (Amp1-4). Amp4-AltB was used for the final reaction. Nuclei were stained with DAPI.

### Immunostaining

For whole-mount immunofluorescence, embryos were fixed in 4% paraformaldehyde overnight at  $4^{\circ}\text{C}$  and permeabilized in acetone at  $-20^{\circ}\text{C}$  for 12 min. Anti-Vasa antibody (Knaut et al., 2000) was diluted at 1:5000. Alexa Fluor 633-conjugated (Molecular Probes) secondary antibody was diluted at 1:500.

### Imaging

Live blastula stage and post-gastrulation stage embryos were dechorionated and mounted in 1% low-melting-point agarose (A9414, Sigma-Aldrich) in embryo medium. Fixed embryos were mounted in 1% low-melting-point agarose in PBS. For transcriptional analysis, z-stacks of the blastoderm were acquired and subsequently scored for puncta in the nuclei. Fluorescent images of 30 hpf PGCs were acquired with a Leica SP2 point-scanning confocal microscope. All other images were acquired with a Zeiss 5Live DuoScan line-scanning confocal microscope. Fluorescence images were processed using ImageJ. Final adjustments were made using Adobe Illustrator CS5.1.

### Acknowledgements

We thank the Marlow laboratory for discussions, A. Jenny for comments on the manuscript, our animal staff and the Analytical Imaging Facility for microscopy support.

### Competing interests

The authors declare no competing or financial interests.

### Author contributions

P.D.C. performed experiments and analysis, which were conceived and designed by P.D.C. and F.L.M. J.A.C. and R.H.S. contributed reagents and materials. F.L.M. contributed reagents, materials, and analysis tools. All authors discussed the data and manuscript. P.D.C. and F.L.M. wrote the manuscript.

### Funding

This work was supported by the National Institutes of Health [R01GM089979 to F.L.M., R01GM057071, NS083085, and EB013571 to R.H.S., T32-GM007288 and 1F31NS083258 support of P.D.C.]; and the National Cancer Institute [P30CA013330 to the Analytical Imaging Facility (AIF)]. Deposited in PMC for release after 12 months.

### Supplementary material

Supplementary material available online at <http://dev.biologists.org/lookup/suppl/doi:10.1242/dev.118968/-/DC1>

### References

- Armitage, B. A. (2011). Imaging of RNA in live cells. *Curr. Opin. Chem. Biol.* **15**, 806-812.
- Auer, T. O., Duroure, K., De Cian, A., Concordet, J.-P. and Del Bene, F. (2014). Highly efficient CRISPR/Cas9-mediated knock-in in zebrafish by homology-independent DNA repair. *Genome Res.* **24**, 142-153.
- Belaya, K. and St Johnston, D. (2011). Using the mRNA-MS2/MS2CP-FP system to study mRNA transport during *Drosophila* oogenesis. *Methods Mol. Biol.* **714**, 265-283.
- Bertrand, E., Chartrand, P., Schaefer, M., Shenoy, S. M., Singer, R. H. and Long, R. M. (1998). Localization of ASH1 mRNA particles in living yeast. *Mol. Cell* **2**, 437-445.
- Chang, N., Sun, C., Gao, L., Zhu, D., Xu, X., Zhu, X., Xiong, J.-W. and Xi, J. J. (2013). Genome editing with RNA-guided Cas9 nuclease in zebrafish embryos. *Cell Res.* **23**, 465-472.
- Dalle Nogare, D. E., Pauerstein, P. T. and Lane, M. E. (2009). G2 acquisition by transcription-independent mechanism at the zebrafish midblastula transition. *Dev. Biol.* **326**, 131-142.
- Draper, B. W., McCallum, C. M. and Moens, C. B. (2007). *nanos1* is required to maintain oocyte production in adult zebrafish. *Dev. Biol.* **305**, 589-598.
- Gagnon, J. A., Kreiling, J. A., Powrie, E. A., Wood, T. R. and Mowry, K. L. (2013). Directional transport is mediated by a Dynein-dependent step in an RNA localization pathway. *PLoS Biol.* **11**, e1001551.
- Garneau, N. L., Wilusz, J. and Wilusz, C. J. (2007). The highways and byways of mRNA decay. *Nat. Rev. Mol. Cell Biol.* **8**, 113-126.
- Giraldez, A. J., Mishima, Y., Rihel, J., Grocock, R. J., Van Dongen, S., Inoue, K., Enright, A. J. and Schier, A. F. (2006). Zebrafish MiR-430 promotes deadenylation and clearance of maternal mRNAs. *Science* **312**, 75-79.
- Gross-Thebing, T., Paksa, A. and Raz, E. (2014). Simultaneous high-resolution detection of multiple transcripts combined with localization of proteins in whole-mount embryos. *BMC Biol.* **12**, 55.
- Halloran, M. C., Sato-Maeda, M., Warren, J. T., Su, F., Lele, Z., Krone, P. H., Kuwada, J. Y. and Shoji, W. (2000). Laser-induced gene expression in specific cells of transgenic zebrafish. *Development* **127**, 1953-1960.
- Hartley, J. L., Temple, G. F. and Brasch, M. A. (2000). DNA cloning using *in vitro* site-specific recombination. *Genome Res.* **10**, 1788-1795.
- Hartung, O., Forbes, M. M. and Marlow, F. L. (2014). Zebrafish vasa is required for germ-cell differentiation and maintenance. *Mol. Reprod. Dev.* **81**, 946-961.
- Harvey, S. A., Sealy, I., Kettleborough, R., Fenyes, F., White, R., Stemple, D. and Smith, J. C. (2013). Identification of the zebrafish maternal and paternal transcriptomes. *Development* **140**, 2703-2710.
- Higashijima, S.-i., Okamoto, H., Ueno, N., Hotta, Y. and Eguchi, G. (1997). High-frequency generation of transgenic zebrafish which reliably express GFP in whole muscles or the whole body by using promoters of zebrafish origin. *Dev. Biol.* **192**, 289-299.
- Hocine, S., Raymond, P., Zenklusen, D., Chao, J. A. and Singer, R. H. (2013). Single-molecule analysis of gene expression using two-color RNA labeling in live yeast. *Nat. Methods* **10**, 119-121.
- Holt, C. E. and Bullock, S. L. (2009). Subcellular mRNA localization in animal cells and why it matters. *Science* **326**, 1212-1216.
- Hruscha, A., Krawitz, P., Rechenberg, A., Heinrich, V., Hecht, J., Haass, C. and Schmid, B. (2013). Efficient CRISPR/Cas9 genome editing with low off-target effects in zebrafish. *Development* **140**, 4982-4987.
- Hwang, W. Y., Fu, Y., Reyon, D., Maeder, M. L., Tsai, S. Q., Sander, J. D., Peterson, R. T., Yeh, J.-R. J. and Joung, J. K. (2013a). Efficient genome editing in zebrafish using a CRISPR-Cas system. *Nat. Biotechnol.* **31**, 227-229.
- Hwang, W. Y., Fu, Y., Reyon, D., Maeder, M. L., Kaini, P., Sander, J. D., Joung, J. K., Peterson, R. T. and Yeh, J.-R. J. (2013b). Heritable and precise zebrafish genome editing using a CRISPR-Cas system. *PLoS ONE* **8**, e68708.
- Kawakami, K. (2007). Tol2: a versatile gene transfer vector in vertebrates. *Genome Biol.* **8** Suppl. 1, S7.
- Kawakami, K., Koga, A., Hori, H. and Shima, A. (1998). Excision of the tol2 transposable element of the medaka fish, *Oryzias latipes*, in zebrafish, *Danio rerio*. *Gene* **225**, 17-22.
- Kawakami, K., Imanaka, K., Itoh, M. and Taira, M. (2004). Excision of the Tol2 transposable element of the medaka fish *Oryzias latipes* in *Xenopus laevis* and *Xenopus tropicalis*. *Gene* **338**, 93-98.
- Kimmel, C. B., Ballard, W. W., Kimmel, S. R., Ullmann, B. and Schilling, T. F. (1995). Stages of embryonic development of the zebrafish. *Dev. Dyn.* **203**, 253-310.
- Knaut, H., Pelegri, F., Bohmann, K., Schwarz, H. and Nusslein-Volhard, C. (2000). Zebrafish vasa RNA but not its protein is a component of the germ plasm and segregates asymmetrically before germline specification. *J. Cell Biol.* **149**, 875-888.
- Koprunner, M., Thisse, C., Thisse, B. and Raz, E. (2001). A zebrafish *nanos*-related gene is essential for the development of primordial germ cells. *Genes Dev.* **15**, 2877-2885.
- Kwan, K. M., Fujimoto, E., Grabher, C., Mangum, B. D., Hardy, M. E., Campbell, D. S., Parant, J. M., Yost, H. J., Kanki, J. P. and Chien, C.-B. (2007). The Tol2kit: a multisite gateway-based construction kit for Tol2 transposon transgenesis constructs. *Dev. Dyn.* **236**, 3088-3099.
- Langley, A. R., Smith, J. C., Stemple, D. L. and Harvey, S. A. (2014). New insights into the maternal to zygotic transition. *Development* **141**, 3834-3841.
- Larson, D. R., Zenklusen, D., Wu, B., Chao, J. A. and Singer, R. H. (2011). Real-time observation of transcription initiation and elongation on an endogenous yeast gene. *Science* **332**, 475-478.
- Lee, M. T., Bonneau, A. R. and Giraldez, A. J. (2014). Zygotic genome activation during the maternal-to-zygotic transition. *Annu. Rev. Cell Dev. Biol.* **30**, 581-613.
- Lionnet, T., Czaplinski, K., Darzacq, X., Shav-Tal, Y., Wells, A. L., Chao, J. A., Park, H. Y., de Turris, V., Lopez-Jones, M. and Singer, R. H. (2011).

- A transgenic mouse for in vivo detection of endogenous labeled mRNA. *Nat. Methods* **8**, 165-170.
- Mishima, Y., Giraldez, A. J., Takeda, Y., Fujiwara, T., Sakamoto, H., Schier, A. F. and Inoue, K. (2006). Differential regulation of germline mRNAs in soma and germ cells by zebrafish miR-430. *Curr. Biol.* **16**, 2135-2142.
- Newport, J. and Kirschner, M. (1982). A major developmental transition in early *Xenopus* embryos: II. Control of the onset of transcription. *Cell* **30**, 687-696.
- Park, H. Y., Lim, H., Yoon, Y. J., Follenzi, A., Nwokafor, C., Lopez-Jones, M., Meng, X. and Singer, R. H. (2014). Visualization of dynamics of single endogenous mRNA labeled in live mouse. *Science* **343**, 422-424.
- Pauli, A., Rinn, J. L. and Schier, A. F. (2011). Non-coding RNAs as regulators of embryogenesis. *Nat. Rev. Genet.* **12**, 136-149.
- Pauli, A., Valen, E., Lin, M. F., Garber, M., Vastenhouw, N. L., Levin, J. Z., Fan, L., Sandelin, A., Rinn, J. L., Regev, A. et al. (2012). Systematic identification of long noncoding RNAs expressed during zebrafish embryogenesis. *Genome Res.* **22**, 577-591.
- Santangelo, P. J., Alonas, E., Jung, J., Lifland, A. W. and Zurla, C. (2012). Probes for intracellular RNA imaging in live cells. *Methods Enzymol.* **505**, 383-399.
- Schier, A. F. (2007). The maternal-zygotic transition: death and birth of RNAs. *Science* **316**, 406-407.
- Schonberger, J., Hammes, U. Z. and Dresselhaus, T. (2012). In vivo visualisation of RNA in plants cells using the lambdaN(22) system and a GATEWAY-compatible vector series for candidate RNAs. *Plant J.* **71**, 173-181.
- Shin, J., Chen, J. and Solnica-Krezel, L. (2014). Efficient homologous recombination-mediated genome engineering in zebrafish using TALE nucleases. *Development* **141**, 3807-3818.
- Slanchev, K., Stebler, J., Goudarzi, M., Cojocaru, V., Weidinger, G. and Raz, E. (2009). Control of Dead end localization and activity—implications for the function of the protein in antagonizing miRNA function. *Mech. Dev.* **126**, 270-277.
- Strasser, M. J., Mackenzie, N. C., Dumstrei, K., Nakkrasae, L.-I., Stebler, J. and Raz, E. (2008). Control over the morphology and segregation of Zebrafish germ cell granules during embryonic development. *BMC Dev. Biol.* **8**, 58.
- Tadros, W. and Lipshitz, H. D. (2009). The maternal-to-zygotic transition: a play in two acts. *Development* **136**, 3033-3042.
- Theusch, E. V., Brown, K. J. and Pelegri, F. (2006). Separate pathways of RNA recruitment lead to the compartmentalization of the zebrafish germ plasm. *Dev. Biol.* **292**, 129-141.
- van Gemert, A. M. C., van der Laan, A. M. A., Pilgram, G. S. K., Fradkin, L. G., Noordermeer, J. N., Tanke, H. J. and Jost, C. R. (2009). In vivo monitoring of mRNA movement in *Drosophila* body wall muscle cells reveals the presence of myofiber domains. *PLoS ONE* **4**, e6663.
- Villefranc, J. A., Amigo, J. and Lawson, N. D. (2007). Gateway compatible vectors for analysis of gene function in the zebrafish. *Dev. Dyn.* **236**, 3077-3087.
- Walhout, A. J. M., Temple, G. F., Brasch, M. A., Hartley, J. L., Lorson, M. A., van den Heuvel, S. and Vidal, M. (2000). GATEWAY recombinational cloning: application to the cloning of large numbers of open reading frames or ORFeomes. *Methods Enzymol.* **328**, 575-592.
- Weidinger, G., Stebler, J., Slanchev, K., Dumstrei, K., Wise, C., Lovell-Badge, R., Thisse, C., Thisse, B. and Raz, E. (2003). dead end, a novel vertebrate germ plasm component, is required for zebrafish primordial germ cell migration and survival. *Curr. Biol.* **13**, 1429-1434.
- Westerfield, M. (2000). *The Zebrafish Book. A Guide for the Laboratory use of Zebrafish (Danio rerio)*. Eugene: University of Oregon Press.
- Wu, B., Chao, J. A. and Singer, R. H. (2012). Fluorescence fluctuation spectroscopy enables quantitative imaging of single mRNAs in living cells. *Biophys. J.* **102**, 2936-2944.
